# Supplementary material for: Antibacterial Properties and Potential Mechanism of Serum from Chinese Alligator
Source: MDPI journal article supplement (doi:10.3390/microorganisms10112210), 2022-11-08
Supplement: s1 [file s1]

Supplementary Figures

Secondary Structure and Solvent Accessibility Prediction

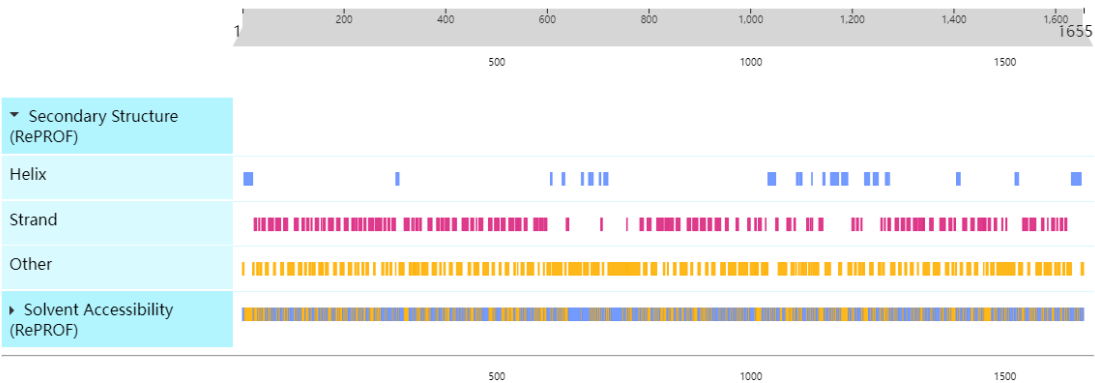

Figure S1. Secondary structure composition of complement C3 protein in Chinese alligator.

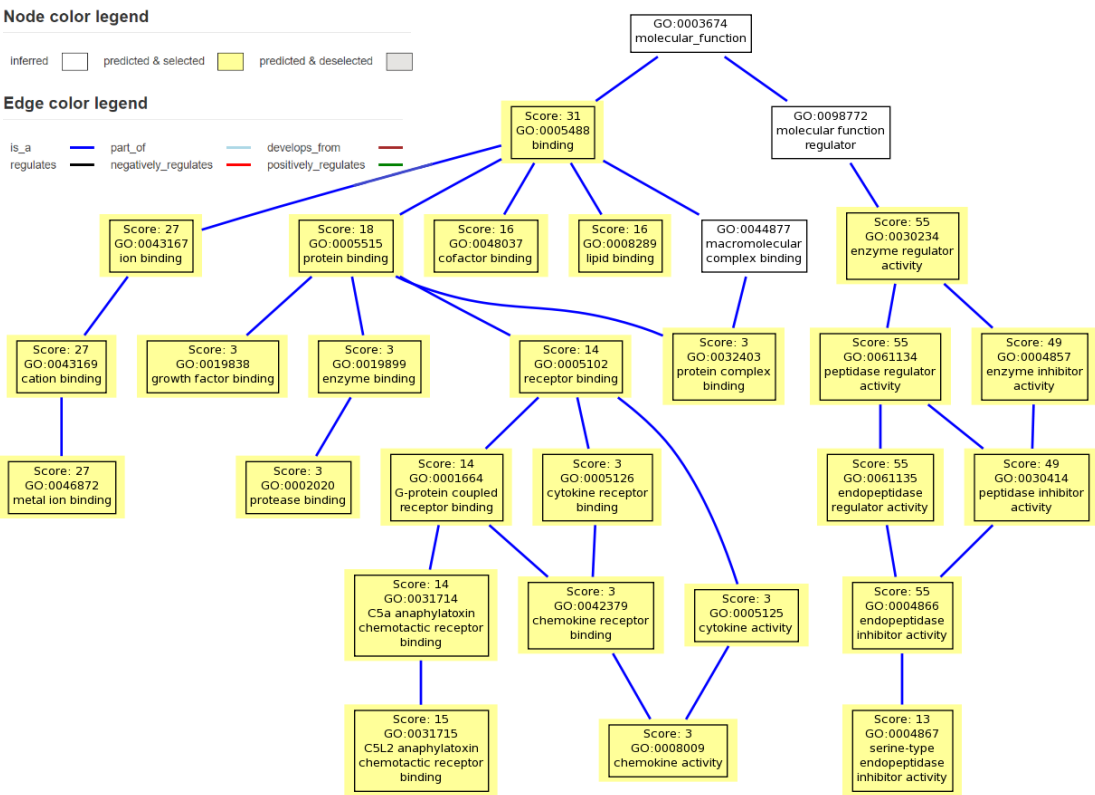

Figure S2. Molecular functional ontology of Chinese alligator complement C3 protein.



| 1   | 2   | 3   | 4    | 5    | 6    | 7     | 8     | 9     | 10     | 11 | 12 |
|-----|-----|-----|------|------|------|-------|-------|-------|--------|----|----|
|     |     |     |      |      |      |       |       |       |        |    |    |
| 1/2 | 1/4 | 1/8 | 1/16 | 1/32 | 1/64 | 1/128 | 1/256 | 1/512 | 1/1024 | +  | -  |
|     |     |     |      |      |      |       |       |       |        |    |    |
| 1/2 | 1/4 | 1/8 | 1/16 | 1/32 | 1/64 | 1/128 | 1/256 | 1/512 | 1/1024 | +  | -  |
|     |     |     |      |      |      |       |       |       |        |    |    |
| 1/2 | 1/4 | 1/8 | 1/16 | 1/32 | 1/64 | 1/128 | 1/256 | 1/512 | 1/1024 | +  | -  |
|     |     |     |      |      |      |       |       |       |        |    |    |
|     |     |     |      |      |      |       |       |       |        |    |    |

**Figure S5.** Sample configuration scheme for the determination of serum inhibitory concentration of Chinese alligator in 96-well plate.

| 1  | 2 | 3 | 4 | 5 | 6 | 7 | 8 | 9 | 10 | 11 | 12 |
|----|---|---|---|---|---|---|---|---|----|----|----|
|    |   |   |   |   |   |   |   |   |    |    |    |
| R1 |   |   |   |   |   |   |   |   |    |    |    |
|    |   |   |   |   |   |   |   |   |    |    |    |
| R2 |   |   |   |   |   |   |   |   |    |    |    |
|    |   |   |   |   |   |   |   |   |    |    |    |
| R3 |   |   |   |   |   |   |   |   |    |    |    |
|    |   |   |   |   |   |   |   |   |    |    |    |
|    |   |   |   |   |   |   |   |   |    |    |    |

100μL P/S S+100μL bacteria solution

100μL alligator serum+100μL bacteria solution

100μL FBS+100μL bacteria solution

100μL MHB+100μL bacteria solution

200μL MHB

**Figure S6.** Sample configuration scheme of 96-well plate for Chinese alligator serum antibacterial experiment.

| 1  | 2 | 3 | 4 | 5 | 6 | 7 | 8 | 9 | 10 | 11 | 12 |
|----|---|---|---|---|---|---|---|---|----|----|----|
|    |   |   |   |   |   |   |   |   |    |    |    |
| R1 |   |   |   |   |   |   |   |   |    |    |    |
|    |   |   |   |   |   |   |   |   |    |    |    |
| R2 |   |   |   |   |   |   |   |   |    |    |    |
|    |   |   |   |   |   |   |   |   |    |    |    |
| R3 |   |   |   |   |   |   |   |   |    |    |    |
|    |   |   |   |   |   |   |   |   |    |    |    |
|    |   |   |   |   |   |   |   |   |    |    |    |

200μL MHB

90μL bacteria solution+110μL MHB

90μL bacteria solution+90μL MHB+20μL proteinase K

90μL bacteria solution+90μL P/S S+20μL MHB

90μL bacteria solution+90μL Alligator serum+20μL proteinase K

90μL bacteria solution+90μL Alligator serum+20μL MHB

**Figure S7.** Sample configuration scheme for determination of antibacterial components in Chinese alligator serum in 96-well plate.

## Supplementary Tables

**Table S1.** Parameters used in proteins identification.

| Item                    | Value                                           |
|-------------------------|-------------------------------------------------|
| Type of search          | MS/MS Ion search                                |
| Enzyme                  | Trypsin/P                                       |
| Fragment Mass Tolerance | ± 0.02 Da                                       |
| Mass Values             | Monoisotopic                                    |
| Variable modifications  | Oxidation (M)                                   |
| Peptide Mass Tolerance  | 10 ppm                                          |
| Instrument type         | Default                                         |
| Max Missed Cleavages    | 2                                               |
|                         | Carbamidomethyl(C), TMT6plex (N-term), TMT6plex |
| Fixed modifications     | (K)                                             |
| Database                | uniprot                                         |

**Table S2.** The top 20 pathways of serum protein annotated results in the KEGG database.

| KEGG Pathway                           | Proteins with pathway<br>annotation (488) | Pathway ID     |
|----------------------------------------|-------------------------------------------|----------------|
| Phagosome                              | 90 (18.44%)                               | ko04145        |
| PI3K-Akt signaling pathway             | 85 (17.42%)                               | ko04151        |
| <b>Leishmaniasis</b>                   | <b>82 (16.8%)</b>                         | <b>ko05140</b> |
| Dilated cardiomyopathy                 | 80 (16.39%)                               | ko05414        |
| <b>Staphylococcus aureus infection</b> | <b>79 (16.19%)</b>                        | <b>ko05150</b> |
| <b>Amoebiasis</b>                      | <b>70 (14.34%)</b>                        | <b>ko05146</b> |
| <b>Viral myocarditis</b>               | <b>67 (13.73%)</b>                        | <b>ko05416</b> |
| Hematopoietic cell lineage             | 67 (13.73%)                               | ko04640        |

|                                            |                    |                |
|--------------------------------------------|--------------------|----------------|
| Tuberculosis                               | 66 (13.52%)        | ko05152        |
| <b>Systemic lupus erythematosus</b>        | <b>65 (13.32%)</b> | <b>ko05322</b> |
| Natural killer cell mediated cytotoxicity  | 64 (13.11%)        | ko04650        |
| <b>Primary immunodeficiency</b>            | <b>64 (13.11%)</b> | <b>ko05340</b> |
| <b>Complement and coagulation cascades</b> | <b>64 (13.11%)</b> | <b>ko04610</b> |
| <b>Rheumatoid arthritis</b>                | <b>59 (12.09%)</b> | <b>ko05323</b> |
| Epstein-Barr virus infection               | 58 (11.89%)        | ko05169        |
| Cell adhesion molecules (CAMs)             | 57 (11.68%)        | ko04514        |
| Regulation of actin cytoskeleton           | 54 (11.07%)        | ko04810        |
| Rap1 signaling pathway                     | 53 (10.86%)        | ko04015        |
| Pertussis                                  | 52 (10.66%)        | ko05133        |
| Calcium signaling pathway                  | 50 (10.25%)        | ko04020        |

**Table S3.** Composition of amino acid residues in complement C3 protein of Chinese alligator, human and cattle.

|                | Chinese alligator |            | Human    |            | Cattle   |            |
|----------------|-------------------|------------|----------|------------|----------|------------|
|                | Quantity          | Proportion | Quantity | Proportion | Quantity | Proportion |
| <b>Ala (A)</b> | 87                | 5.30%      | 96       | 5.90%      | 95       | 5.80%      |
| <b>Arg (R)</b> | 63                | 3.90%      | 82       | 5.00%      | 81       | 4.90%      |
| <b>Asn (N)</b> | 68                | 4.20%      | 61       | 3.70%      | 64       | 3.90%      |
| <b>Asp (D)</b> | 84                | 5.10%      | 90       | 5.50%      | 102      | 6.20%      |
| <b>Cys (C)</b> | 29                | 1.80%      | 27       | 1.60%      | 27       | 1.60%      |
| <b>Gln (Q)</b> | 73                | 4.50%      | 90       | 5.50%      | 88       | 5.40%      |
| <b>Glu (E)</b> | 119               | 7.30%      | 123      | 7.50%      | 112      | 6.80%      |
| <b>Gly (G)</b> | 96                | 5.90%      | 95       | 5.80%      | 96       | 5.90%      |

|                |     |       |     |       |     |       |
|----------------|-----|-------|-----|-------|-----|-------|
| <b>His (H)</b> | 30  | 1.80% | 28  | 1.70% | 32  | 2.00% |
| <b>Ile (I)</b> | 103 | 6.30% | 83  | 5.10% | 96  | 5.90% |
| <b>Leu (L)</b> | 137 | 8.40% | 150 | 9.10% | 144 | 8.80% |
| <b>Lys (K)</b> | 130 | 8.00% | 113 | 6.90% | 122 | 7.40% |
| <b>Met (M)</b> | 39  | 2.40% | 35  | 2.10% | 30  | 1.80% |
| <b>Phe (F)</b> | 62  | 3.80% | 60  | 3.70% | 54  | 3.30% |
| <b>Pro (P)</b> | 70  | 4.30% | 80  | 4.90% | 74  | 4.50% |
| <b>Ser (S)</b> | 112 | 6.90% | 106 | 6.50% | 95  | 5.80% |
| <b>Thr (T)</b> | 107 | 6.60% | 103 | 6.30% | 105 | 6.40% |
| <b>Trp (W)</b> | 18  | 1.10% | 17  | 1.00% | 17  | 1.00% |
| <b>Tyr (Y)</b> | 60  | 3.70% | 57  | 3.50% | 62  | 3.80% |
| <b>Val (V)</b> | 146 | 8.90% | 145 | 8.80% | 143 | 8.70% |
| <b>Pyl (O)</b> | 0   | 0.00% | 0   | 0.00% | 0   | 0.00% |
| <b>Sec (U)</b> | 0   | 0.00% | 0   | 0.00% | 0   | 0.00% |

---
